# Supplementary material for: 5d → 4f transition of a lanthanide-activated MGa2S4 (M = Ca, Sr) semiconductor for mechanical-to-light energy conversion mediated by structural distortion
Source: Royal Society of Chemistry journal article supplement (doi:10.1039/d2dt00883a), 2022-01-01
Supplement: d2dt00883a3.pdf [file d2dt00883a3.pdf]

## Supporting Information

### 5d → 4f Transition of Lanthanide-Activated $\text{M}\text{Ga}_2\text{S}_4$ ( $\text{M} = \text{Ca}, \text{Sr}$ )

#### Semiconductor for Mechanical-to-Light Energy Conversion

#### Mediated by Structural Distortion

*Xianhui Zhang<sup>a, b</sup>, Dong Yang<sup>c</sup>, Shaofan Wu<sup>a</sup>, Xieming Xu<sup>a, b</sup>, Ronghua Ma<sup>d</sup>, Dengfeng Peng<sup>d, \*</sup>, Zhilin Wang<sup>a, b</sup>, and Shuaihua Wang<sup>a, \*</sup>*

<sup>a</sup>Key Laboratory of Optoelectronic Materials Chemistry and Physics, Fujian Institute of Research on the Structure of Matter, Chinese Academy of Sciences, Fuzhou 350002, China

<sup>b</sup>University of the Chinese Academy of Sciences, Beijing 100049, China

<sup>c</sup>State Key Laboratory of New Ceramics and Fine Processing, School of Materials Science and Engineering, Tsinghua University

<sup>d</sup>Key Laboratory of Optoelectronic Devices and Systems of Ministry of Education and Guangdong Province, College of Optoelectronic Engineering, Shenzhen University, Shenzhen 518060, China

\*Corresponding authors.

Email address: shwang@fjirsm.ac.cn (S.H. Wang), pengdengfeng@szu.edu.cn (D.F. Peng)

**Table S1.** Crystal Data and Structure Refinements of CaGa<sub>2</sub>S<sub>4</sub> and SrGa<sub>2</sub>S<sub>4</sub>.

| formula                                                         | CaGa <sub>2</sub> S <sub>4</sub> | SrGa <sub>2</sub> S <sub>4</sub> |
|-----------------------------------------------------------------|----------------------------------|----------------------------------|
| <b>fw(g/mol<sup>-1</sup>)</b>                                   | 4924.16                          | 5684.80                          |
| <b>crystal system</b>                                           | Orthorhombic                     | Orthorhombic                     |
| <b>space group</b>                                              | <i>Fddd</i> (No. 70)             | <i>Fddd</i> (No. 70)             |
| <b>a (Å)</b>                                                    | 20.084(6)                        | 20.8316(2)                       |
| <b>b (Å)</b>                                                    | 20.046(6)                        | 20.4949(2)                       |
| <b>c (Å)</b>                                                    | 12.105(3)                        | 12.2090(1)                       |
| <b>α (deg)</b>                                                  | 90                               | 90                               |
| <b>β (deg)</b>                                                  | 90                               | 90                               |
| <b>γ (deg)</b>                                                  | 90                               | 90                               |
| <b>V (Å<sup>3</sup>)</b>                                        | 4873.9(4)                        | 5212.53(8)                       |
| <b>Z</b>                                                        | 32                               | 32                               |
| <b>D<sub>c</sub> (g·cm<sup>-3</sup>)</b>                        | 3.355                            | 3.622                            |
| <b>μ (mm<sup>-1</sup>)</b>                                      | 10.911                           | 20.767                           |
| <b>GOOF on F<sup>2</sup></b>                                    | 1.049                            | 1.146                            |
| <b>R<sub>1</sub>, wR<sub>2</sub> (I &gt; 2σ(I))<sup>a</sup></b> | 0.0325, 0.0954                   | 0.0258, 0.0665                   |

$$^a R_1 = \sum ||F_o| - |F_c|| / \sum |F_o|, wR_2 = [\sum w(F_o^2 - F_c^2)^2 / \sum w(F_o^2)^2]^{1/2}.$$

**Table S2.** The cell parameters of CaGa<sub>2</sub>S<sub>4</sub> based models used in DFT calculation.

| Parameters | Pure | Eu | Ce | Ce-Eu |
|------------|------|----|----|-------|
|------------|------|----|----|-------|

|                                  |         |         |         |         |
|----------------------------------|---------|---------|---------|---------|
| <b>a(Å)</b>                      | 14.2106 | 14.2112 | 14.2120 | 14.2116 |
| <b>b(Å)</b>                      | 11.7408 | 11.7410 | 11.7419 | 11.7415 |
| <b>c(Å)</b>                      | 11.7296 | 11.7300 | 11.7332 | 11.7318 |
| <b><math>\alpha^\circ</math></b> | 74.5252 | 74.5259 | 74.5280 | 74.5268 |
| <b><math>\beta^\circ</math></b>  | 52.7734 | 52.7740 | 52.7763 | 52.7749 |
| <b><math>\gamma^\circ</math></b> | 52.7014 | 52.7028 | 52.7046 | 52.7037 |

**Table S3.** The experimental and optimized cell parameters, Bader charge analysis, bandgap of  $\text{CaGa}_2\text{S}_4$  and  $\text{CaGa}_2\text{S}_4:\text{Eu}$ , and the optimized bond lengths of Ca–S/Eu–S at the Eu dope site.

| Parameter                     | $\text{CaGa}_2\text{S}_4(\text{exp})$ |       | $\text{CaGa}_2\text{S}_4(\text{cal})$ |       | $\text{CaGa}_2\text{S}_4:\text{Eu}(\text{cal})$ |       |
|-------------------------------|---------------------------------------|-------|---------------------------------------|-------|-------------------------------------------------|-------|
| a(Å)                          | 12.1053                               |       | 12.2273                               |       | 12.2445                                         |       |
| b(Å)                          | 20.0466                               |       | 20.2573                               |       | 20.3129                                         |       |
| c(Å)                          | 20.0846                               |       | 20.3207                               |       | 20.4501                                         |       |
| $\alpha^\circ$                | 90                                    |       | 90                                    |       | 90                                              |       |
| $\beta^\circ$                 | 90                                    |       | 90                                    |       | 90                                              |       |
| $\gamma^\circ$                | 90                                    |       | 90                                    |       | 90                                              |       |
| Bond(Ca/Eu–S) at dope site(Å) | 2.975                                 | 3.042 | 3.004                                 | 3.075 | 3.091                                           | 3.128 |
|                               | 2.975                                 | 3.042 | 3.004                                 | 3.075 | 3.091                                           | 3.128 |
|                               | 2.975                                 | 3.042 | 3.004                                 | 3.075 | 3.091                                           | 3.128 |
| Bader charge analysis of Eu   |                                       |       |                                       |       | –1.47e                                          |       |
| Bandgap(eV)                   |                                       |       |                                       |       | 2.57                                            |       |
| Minimum direct bandgap        |                                       |       |                                       |       | 2.59                                            |       |

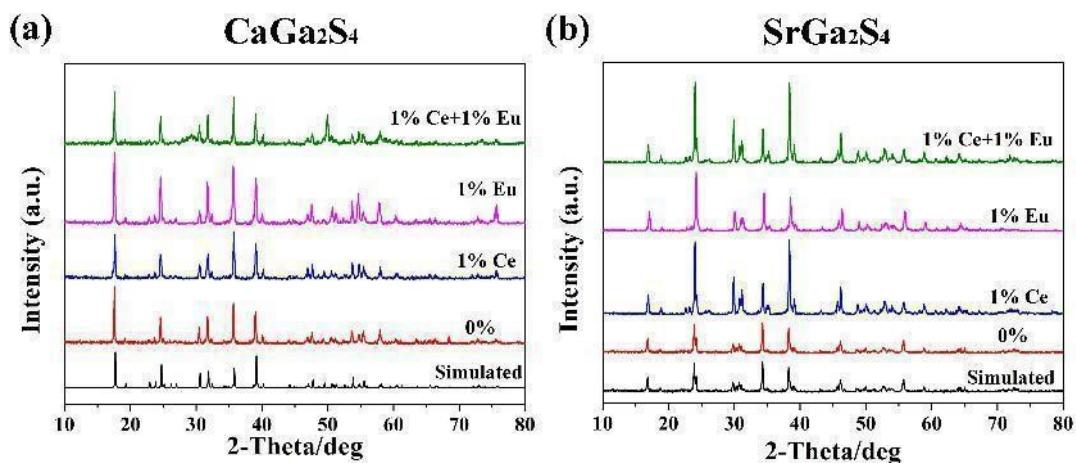

Fig. S1. PXRD patterns of the lanthanides-doped (a)  $\text{CaGa}_2\text{S}_4$  and (b)  $\text{SrGa}_2\text{S}_4$ , respectively.

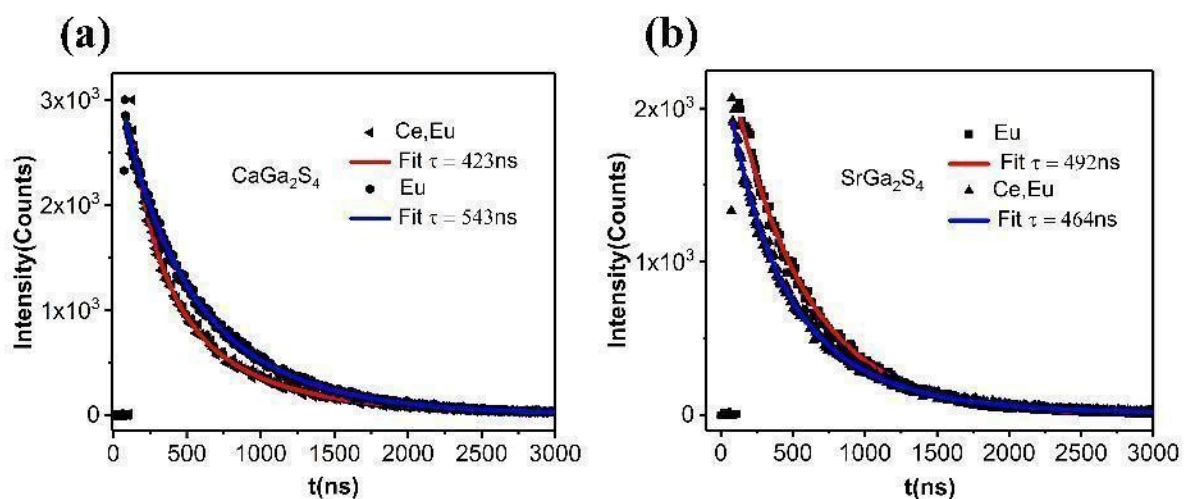

Fig. S2. The fluorescence decay curves of the Eu, Ce-Eu activated (a)  $\text{CaGa}_2\text{S}_4$  and (b)  $\text{SrGa}_2\text{S}_4$ , respectively.

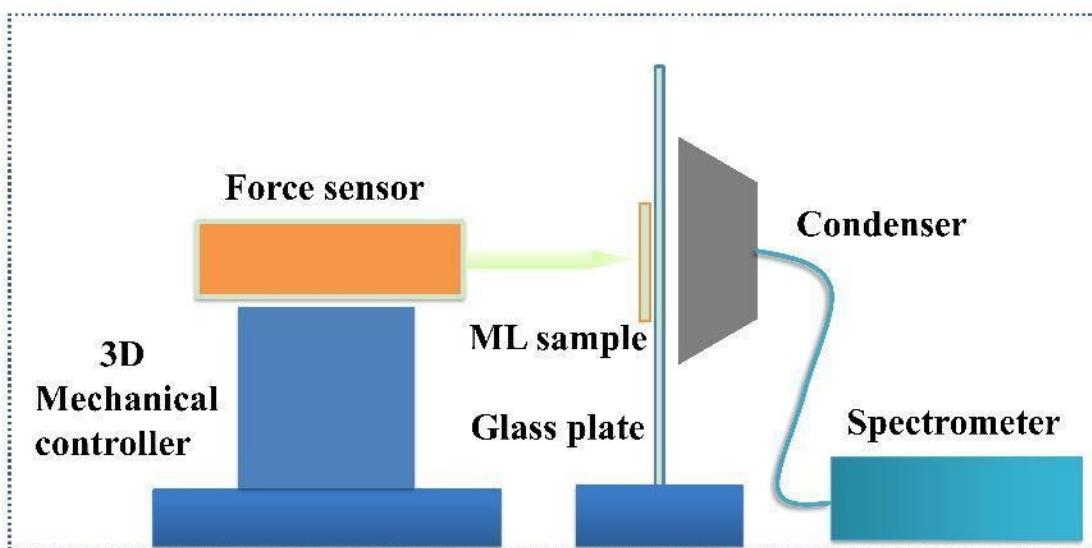

Fig. S3. Schematic diagram of the equipment for ML test.

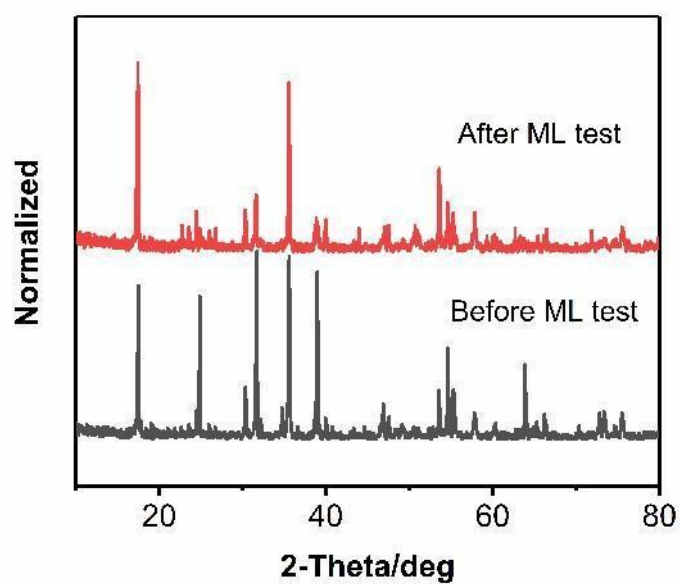

Fig. S4. PXRD of the  $\text{CaGa}_2\text{S}_4: \text{Ce, Eu}$  crystal samples before and after ML test.

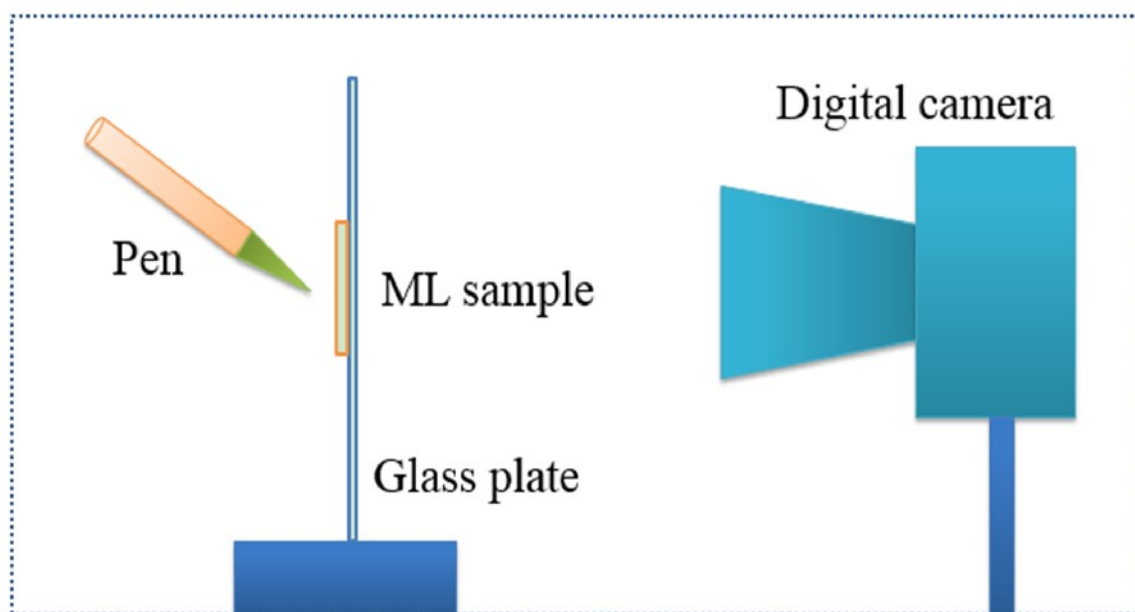

**Fig. S5.** Simplified diagram of signal acquisition of the self-powered display.

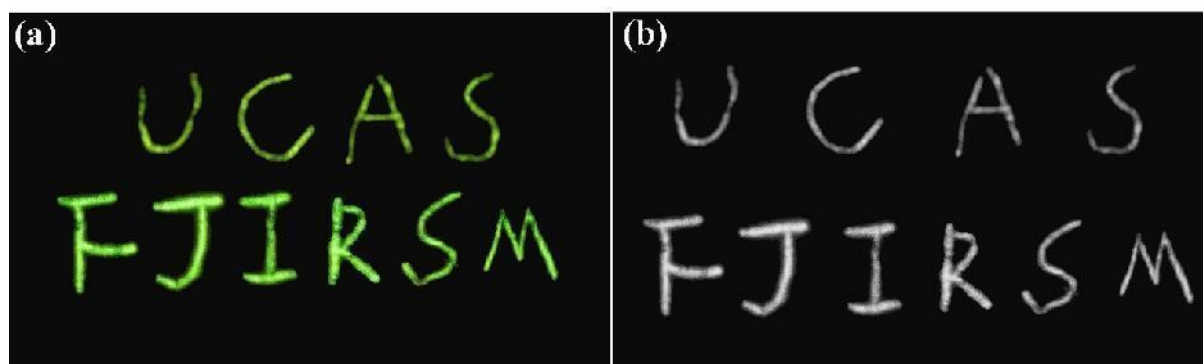

**Fig. S6.** (a) 2D planner pressure map and (b) extracted gray picture of the ML photograph captured from a handwritten letter “UCAS” and “FJIRSM” from the ML film sample.

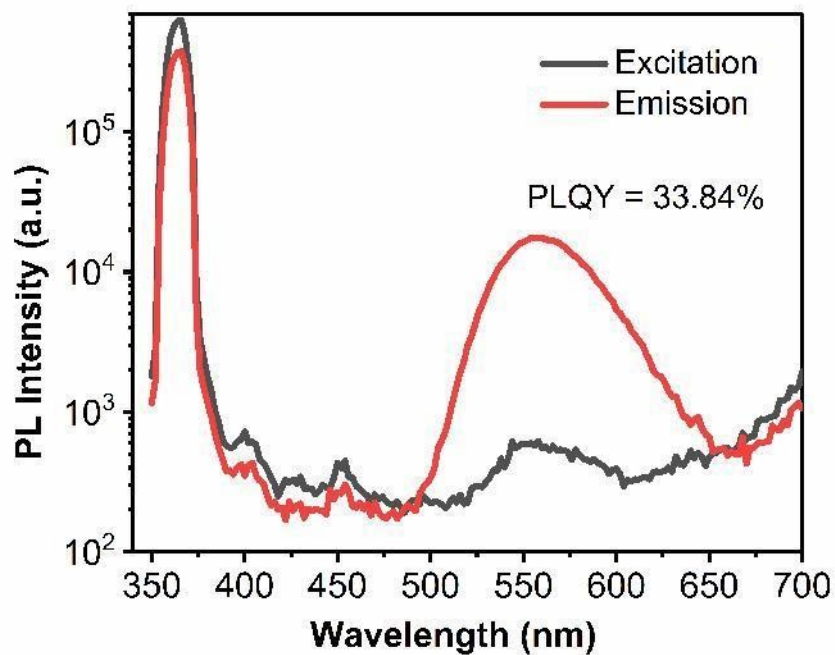

**Fig. S7.** The excitation and emission spectrum of  $\text{CaGa}_2\text{S}_4: \text{Ce}, \text{Eu}$  and the excitation calibration curve without sample for PLQY calculation collected by an integrating sphere under excitation light at 360 nm.

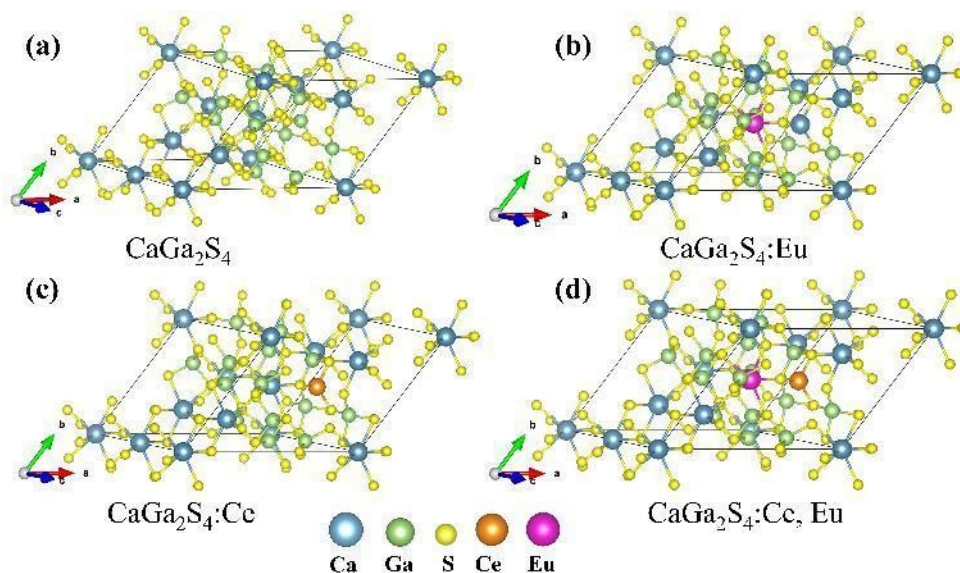

**Fig. S8.** The four optimized models of (a)  $\text{CaGa}_2\text{S}_4$ , (b)  $\text{CaGa}_2\text{S}_4: \text{Eu}$ , (c)  $\text{CaGa}_2\text{S}_4: \text{Ce}$  and (d)  $\text{CaGa}_2\text{S}_4: \text{Ce}, \text{Eu}$  in which the dope concentrations of the activators are 0.0305, 0.0305 and 0.061,

namely, the formula can be written as  $\text{Ca}_{0.9695}\text{Eu}_{0.0305}\text{Ga}_2\text{S}_4$ ,  $\text{Ca}_{0.9695}\text{Ce}_{0.0305}\text{Ga}_2\text{S}_4$ ,  $\text{Ca}_{0.9695}(\text{Ce}, \text{Eu})_{0.061}\text{Ga}_2\text{S}_4$ , respectively.

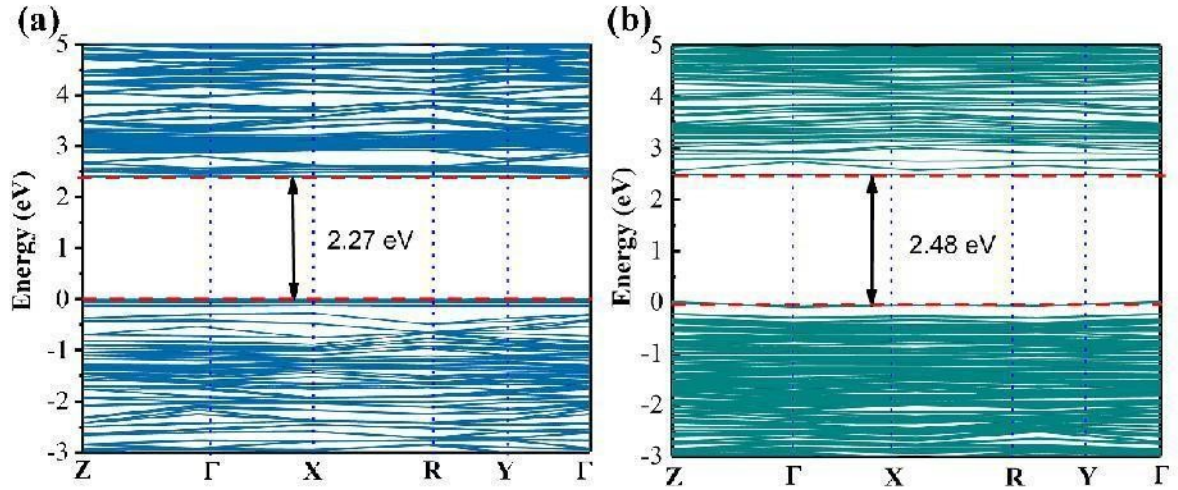

**Fig. S9.** The band structures of (a)  $\text{CaGa}_2\text{S}_4:\text{Eu}$  and (b)  $\text{CaGa}_2\text{S}_4:\text{Ce}$ , represented by sky blue and dark green line.

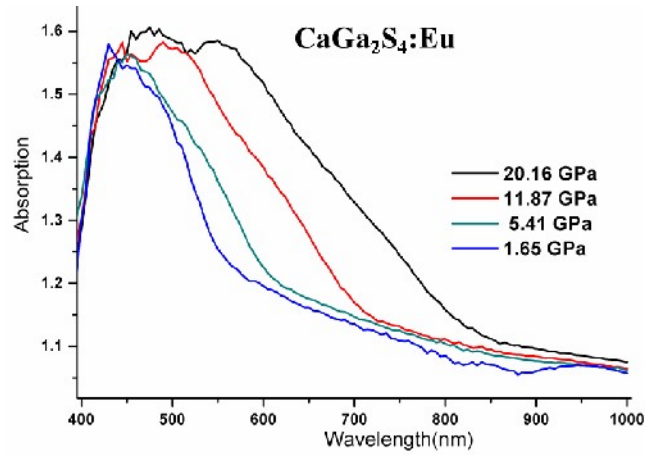

**Fig. S10.** Absorption spectrum of the  $\text{CaGa}_2\text{S}_4:\text{Eu}$  crystals under different high pressures (1.65 GPa, 5.41 GPa, 11.87 GPa and 20.16 GPa).



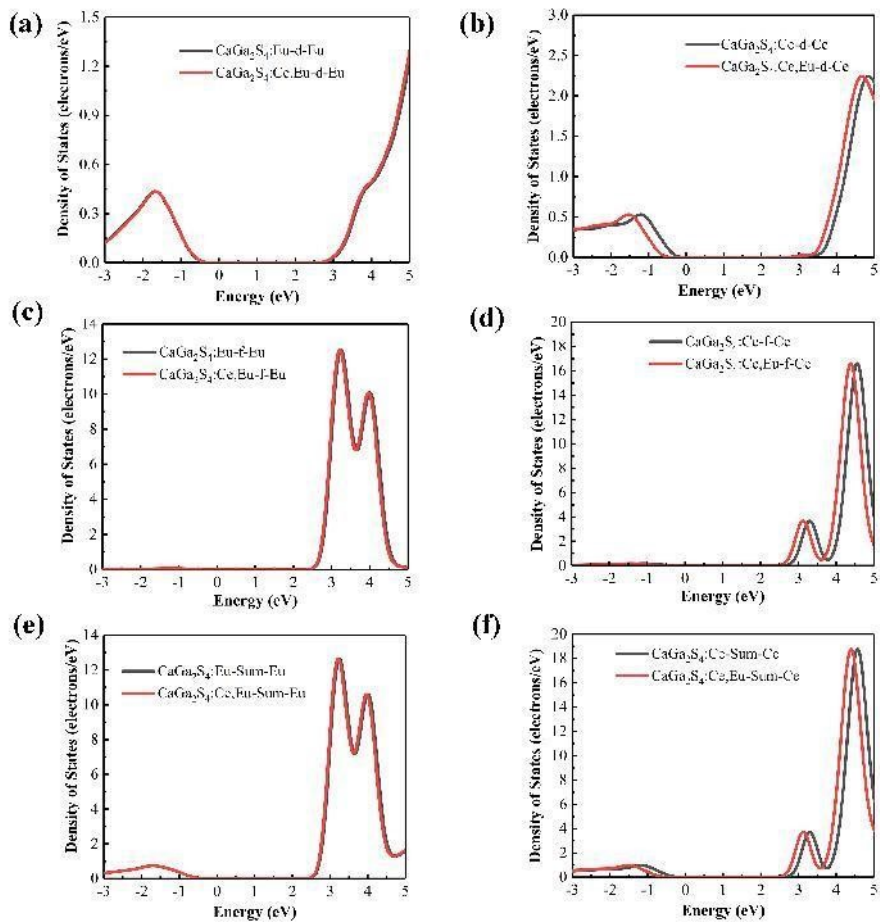

**Fig. S11.** The corresponding PDOS (d and f orbitals of lanthanides) (a-d) and DOS (s, p, d, f orbitals Sum of lanthanides) (e-f) of the Eu, Ce and Ce–Eu doped host  $\text{CaGa}_2\text{S}_4$ .

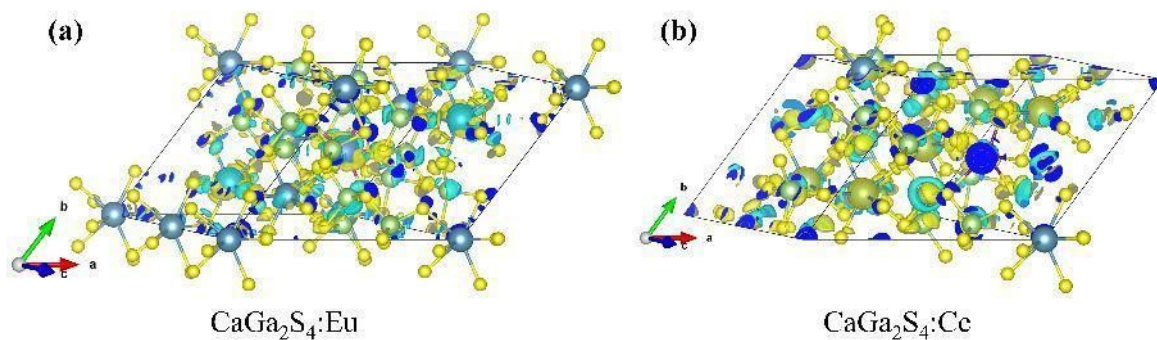

**Fig. S12.** The difference charge density diagrams with respect to (a)  $\text{CaGa}_2\text{S}_4:\text{Eu}$  and (b)  $\text{CaGa}_2\text{S}_4:\text{Ce}$ .

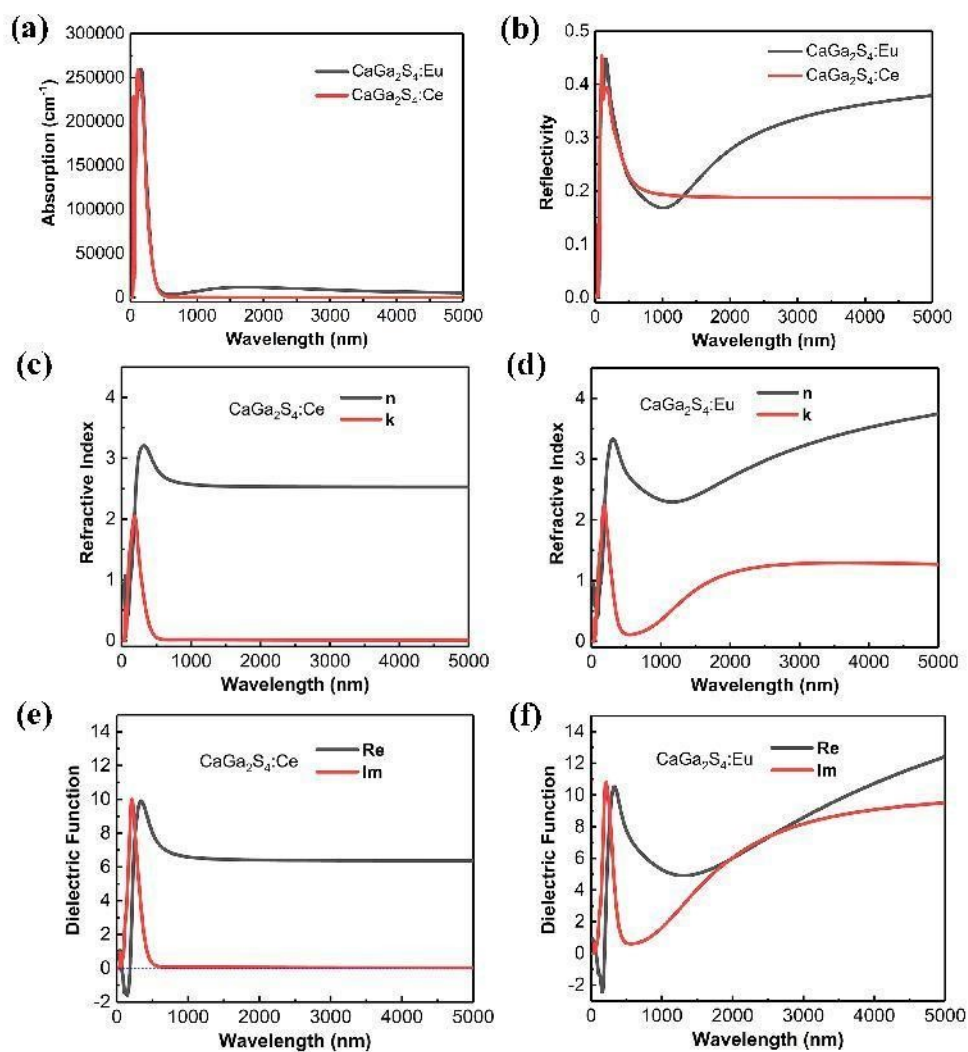

**Fig. S13.** The calculated dielectric functions and optical properties, i.e. reflectivity, refractive index and light absorption of  $\text{CaGa}_2\text{S}_4:\text{Eu}$  and  $\text{CaGa}_2\text{S}_4:\text{Ce}$ .

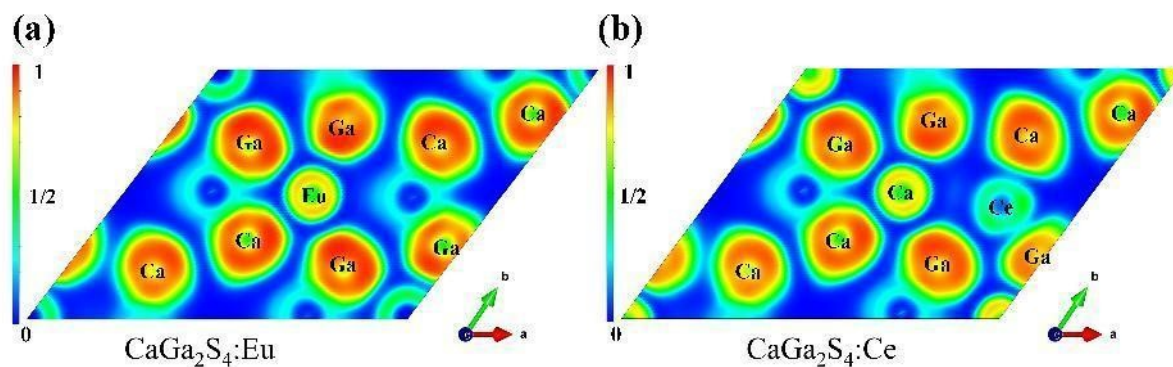

**Fig. S14.** The ELF maps of (a)  $\text{CaGa}_2\text{S}_4$ : Eu and (b)  $\text{CaGa}_2\text{S}_4$ : Ce, respectively.

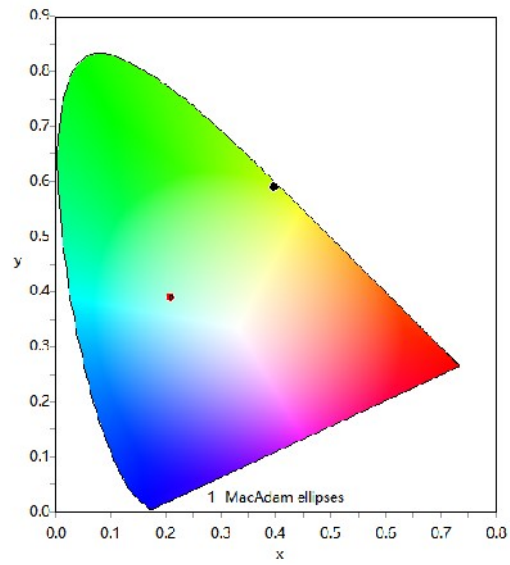

**Fig. S15.** CIE color coordinate diagram corresponding to PL spectrum of the Eu- $\text{CaGa}_2\text{S}_4$  and Ce- $\text{CaGa}_2\text{S}_4$ .

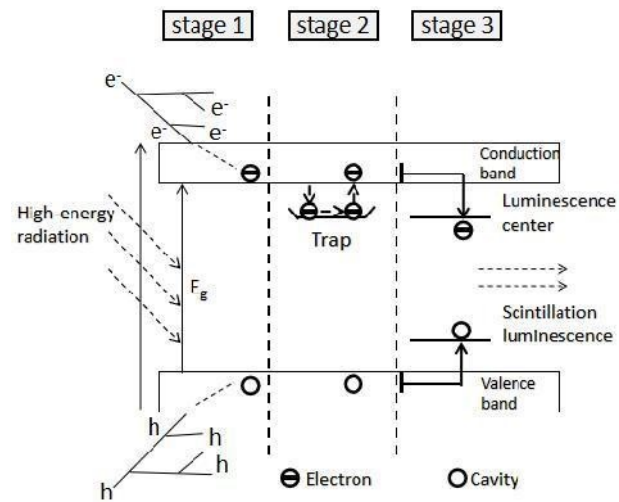

**Fig.S16.** Schematic diagram of scintillation mechanism.

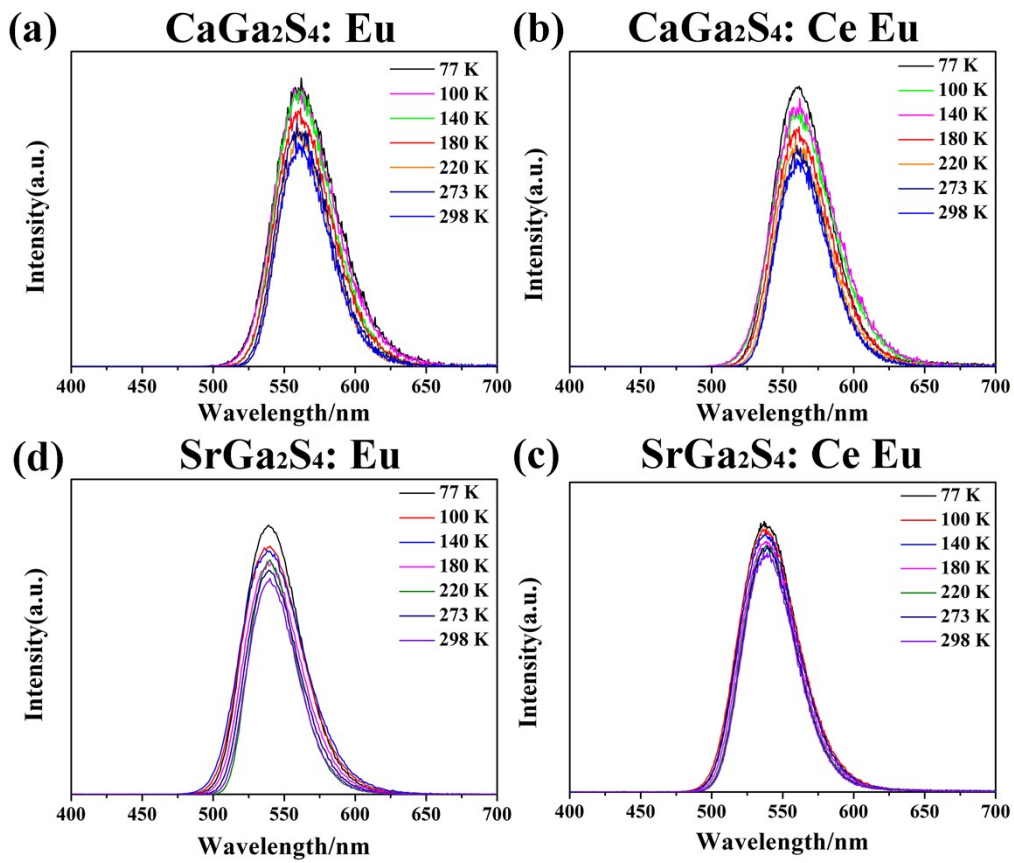

**Fig.S17.** Study on temperature-dependent photoluminescence of the Eu and Ce–Eu doped host  $\text{CaGa}_2\text{S}_4$  and the Eu, Ce and Ce–Eu doped host  $\text{SrGa}_2\text{S}_4$ .

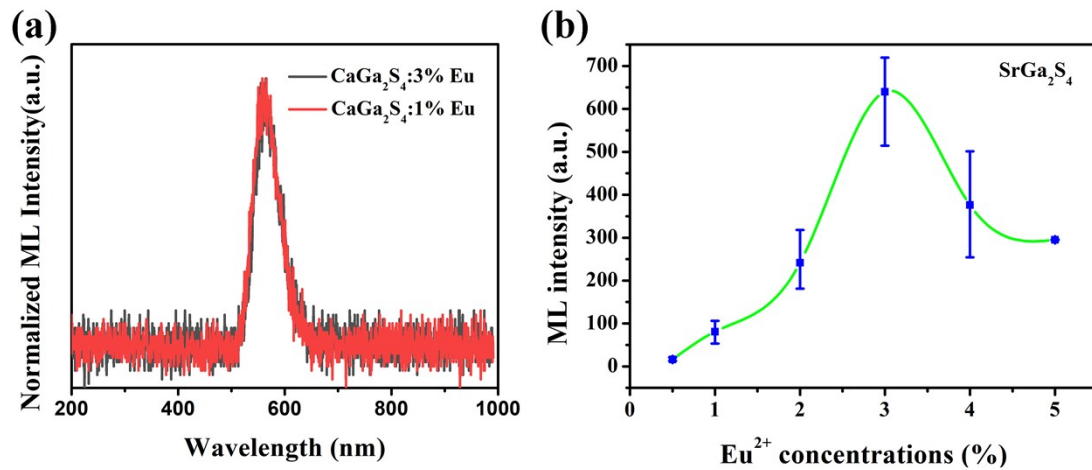

**Fig. S18.** Integrated ML emission comparison of the Eu-doped (a)  $\text{CaGa}_2\text{S}_4$  and (b)  $\text{SrGa}_2\text{S}_4$ , respectively.

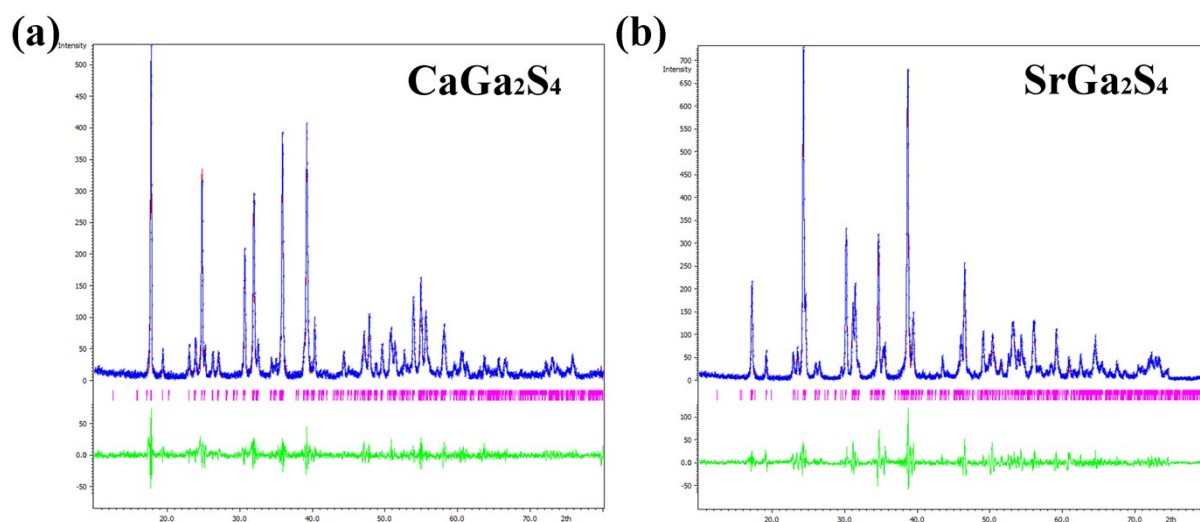

**Fig. S19.** Rietveld refinement of (a)  $\text{CaGa}_2\text{S}_4$  and (b)  $\text{SrGa}_2\text{S}_4$ , respectively.
